# Supplementary material for: Facile p–n control, and magnetic and thermoelectric properties of chromium selenides Cr2+xSe3
Source: Royal Society of Chemistry journal article supplement (doi:10.1039/c9tc01634a), 2019-01-01
Supplement: c9tc01634a1.pdf [file c9tc01634a1.pdf]

*Supplementary Materials for*

## **Facile p-n Control, Magnetic and Thermoelectric Properties of Chromium Selenides $\text{Cr}_{2+x}\text{Se}_3$**

Quansheng Guo,<sup>†</sup> David Berthebaud,<sup>‡</sup> Jumpei Ueda,<sup>§</sup> Setsuhisa Tanabe,<sup>§</sup> Akinobu Miyoshi,<sup>||</sup> Kazuhiko Maeda,<sup>||</sup> and Takao Mori<sup>†‡\*</sup>

<sup>†</sup> Center for Functional Sensor & Actuator (CFSN) & WPI Center for Materials Nanoarchitectonics (WPI-MANA), National Institute for Materials Science (NIMS), Namiki 1-1, Tsukuba 305-0044, Japan

<sup>‡</sup> CNRS-Saint Gobain-NIMS, UMI 3629, Laboratory for Innovative Key Materials and Structures (LINK), National Institute for Materials Science, Tsukuba 305-0044, Japan

<sup>§</sup> Graduate School of Human and Environmental Studies, Kyoto University, Kyoto 606-8501, Japan

<sup>||</sup> Department of Chemistry, School of Science, Tokyo Institute of Technology, 2-12-1-NE-2 Ookayama, Meguro-ku, Tokyo 152-8550, Japan

<sup>‡</sup> Graduate School of Pure and Applied Sciences, University of Tsukuba, Tennoudai 1-1-1, Tsukuba 305-8671, Japan

Corresponding author: MORI.Takao@nims.go.jp

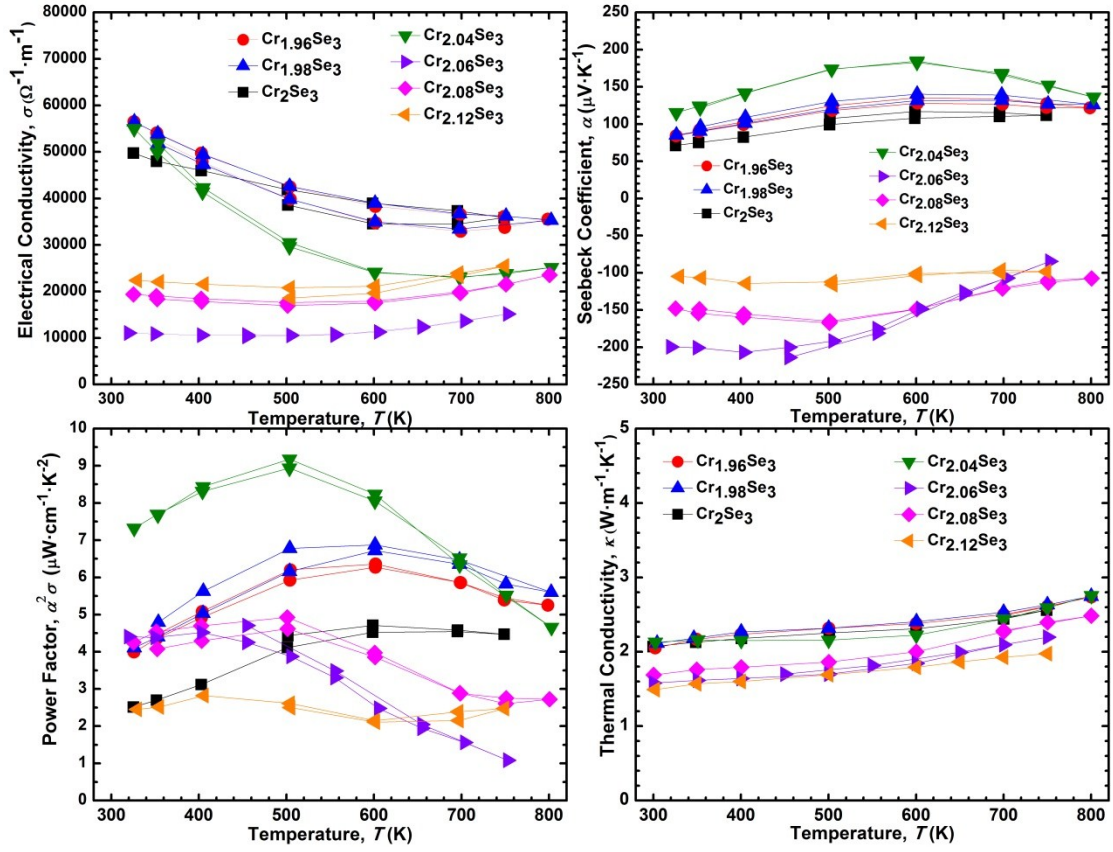

**Figure S1.** Temperature dependence of (a) Electrical conductivity, (b) Seebeck coefficient, (c) Power factor and (d) Thermal conductivity of  $\text{Cr}_{2+x}\text{Se}_3$  ( $x = -0.04, -0.02, 0, 0.04, 0.06, 0.08$  and  $0.12$ ). No significant hysteresis was observed.

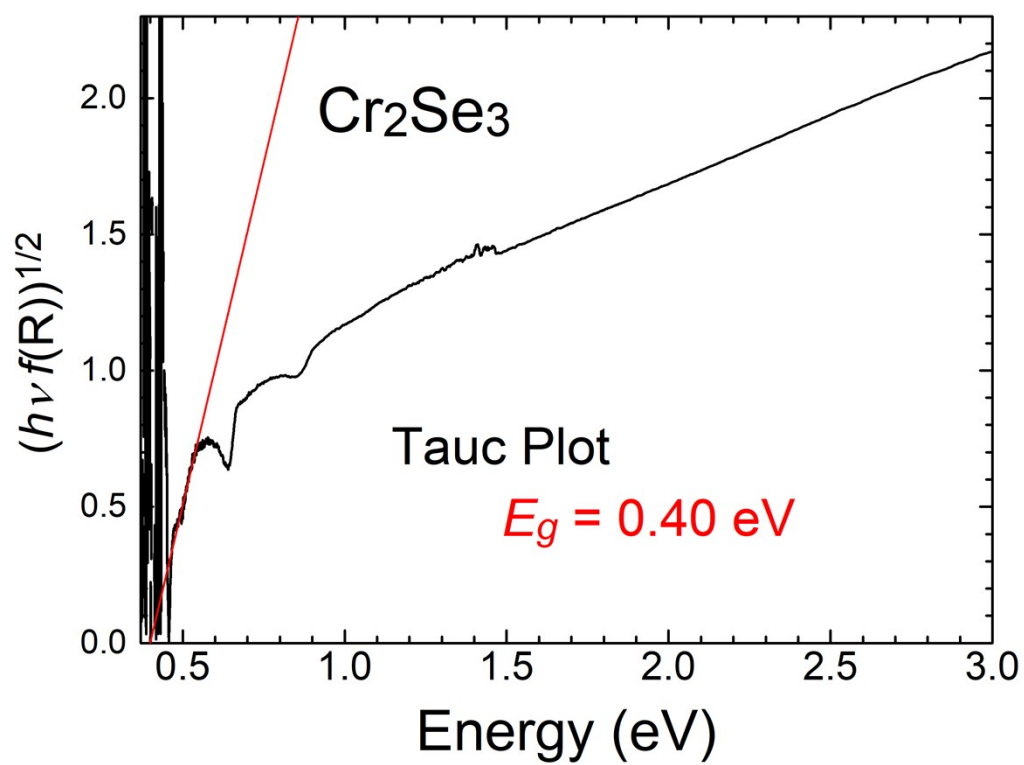

**Figure S2.** Tauc plot for  $\text{Cr}_2\text{Se}_3$ .

**Table S1.** Lattice parameters of  $\text{Cr}_{2+x}\text{Se}_3$  ( $x = -0.04, 0, 0.08$ ) at room temperature.

| Sample                                    | $x = -0.04$           | $x = 0$               | $x = 0.08$            |
|-------------------------------------------|-----------------------|-----------------------|-----------------------|
| $a [\text{\AA}] = b$                      | 6.2478(3)             | 6.2510(2)             | 6.2490(1)             |
| $c [\text{\AA}]$                          | 17.3354(9)            | 17.3280(5)            | 17.3853(4)            |
| $V [\text{\AA}^3]$                        | 586.02(8)             | 586.38(5)             | 587.94(2)             |
| $R_{\text{p}}^a \setminus R_{\text{B}}^b$ | 0.107 \setminus 0.066 | 0.109 \setminus 0.106 | 0.122 \setminus 0.096 |

$$^a R_{\text{p}} = \Sigma |y_{\text{o}} - y_{\text{c}}| / \Sigma |y_{\text{o}}|$$

$$^b R_{\text{B}} = \Sigma |I_{\text{o}} - I_{\text{c}}| / \Sigma |I_{\text{o}}|$$
